# Supplementary material
Source: PubMed Central journal article supplement (PMC4122665)

1 **Supplementary Figure Legends**

2

3 **Supplementary Figure E1. A)** Photographs from a representative patient at wks  
4 0, 2, and 12 after cyclosporine 5mg/kg/day treatment. **B)** Significant reductions in  
5 SCORAD of 50.89% and 73.44% were observed at wks 2 and 12 after CsA. **C)**  
6 Total IgE and **(D)** eosinophil serum levels at wks 2 and 12 of CsA. *pre vs post p-*  
7 *values are indicated. Wk/week; Mean±SEM*

8

9 **Supplementary Figure E2.** Reductions in cellular infiltrates by  
10 immunohistochemistry, in lesional/LS and non-lesional/NL atopic dermatitis at  
11 wks 2 and 12 of CsA. Representative staining is shown, with significant  
12 reductions in CD3+ T-cells **(A,E)**, myeloid/CD11c+ **(B,F)**, CD206+ **(C,G)**, and  
13 mature/CD83+ dendritic cells **(D,H)** at wks2 and 12. *Wk/week; Mean±SD,*  
14 *\*p<0.05/\*\*p<0.01/\*\*\*p<0.001*

15

16 **Supplementary Figure E3.** Changes in a transcriptome subset of immune  
17 genes **(A)**. AD transcriptome improves by 84.25% and 105.95% at wks 2 and 12  
18 respectively **(B)**. *Red/upregulated; Blue/downregulated; Wk/week; AD/atopic*  
19 *dermatitis. Heatmap is arranged by patient SCORAD (white to black gradient)*  
20 *pink = patients with unknown SCORAD.*

21

22 **Supplementary Figure E4.** Representative S100A7 staining at wks 0 and 12 LS  
23 and NL skin **(A)**. Representative 40X magnification H&E **(B)**, arrow points to

24 absence of granular layer at wk 0 and restoration of granular layer at wk 12.  
25 Representative IHC of **C)** filaggrin and **D)** loricrin after treatment in LS and NL AD  
26 (n=5/antibody). *Wk/week; LS/lesional; NL/non lesional; AD/atopic dermatitis;*  
27 *FLG/filaggrin; LOR/loricrin.*

28

29 **Supplementary Figure E5.** Quantitative RT-PCR of several Th2-related  
30 cytokines. **A-D)** mRNA differences from baseline expression levels (fold-  
31 changes/FCHs) in lesional/LS and non-lesional/NL skin at wks2 and 12 of  
32 treatment. *Wk/week; pre vs post p-values are indicated; Mean±SEM*

33

34 **Supplementary Figure E6.** Small increases in mRNA expression of  
35 differentiation genes filaggrin/FLG **(A)**, loricrin/LOR **(B)** and periplakin/PPL **(C)**,  
36 particularly at wk2. *FCH/fold changes; Wk/week; pre vs post p-values are*  
37 *indicated; Mean±SEM*

38

39 **Supplementary Figure E7.** Comparison of selected cellular **(A)** and genomic **(B)**  
40 biomarkers between non-responders and responders at weeks 2 (W2) and 12  
41 (W12) of treatment. Color corresponds to treatment effect on LS skin (W12 vs  
42 W0) in responders. Y-axis shows differences between responders and non-  
43 responders. For example, IL-13 decreased by 5.1 log<sub>2</sub>FCH at W12 in the  
44 responder group, whereas it only slightly increased by 0.5 log<sub>2</sub>FCH in the non-  
45 responder group, corresponding to a difference of 5.6 between the two groups.  
46 *W/week; LS/lesional; FCH/fold change*

47 **Supplementary Figure E8.** Scatterplots corresponding to the top Spearman  
48 correlations in Table E4A-B.

49

50 **Supplementary Table E1.** Demographic data of the atopic dermatitis patients  
51 enrolled in this study, including gender, patient age, race, SCORAD, total serum  
52 IgE, and % eosinophils at baseline, wks 2 and 12, and filaggrin mutation status.

53 *Wk/Week; Scoring of AD/SCORAD.*

54

55 **Supplementary Table E2.** Effects of CsA on the AD transcriptome. The FCHs,  
56  $\log_2$ FCHs, p-values, and status (1=up-regulated, -1=down-regulated, 0=not  
57 differentially expressed) are indicated for each comparison, including post versus  
58 pre-treatment values at wks 2 and 12 for LS and NL skin, and LS versus NL skin  
59 at wks 2 and 12. *DEGs/differentially-expressed genes; LS/lesional; NL/non-*  
60 *lesional; FCH/fold change.*

61

62 **Supplementary Table E3.** Average mRNA expression values and confidence  
63 interval values corresponding with Figure 3.

64

65 **Supplementary Table E4.** LS skin biomarkers significantly correlated with  
66 improvement in the SCORAD index following CsA. Spearman rank correlations  
67 were determined for all evaluated biomarkers quantified by  
68 immunohistochemistry (denoted by "I") and real-time-PCR (RT-PCR) (denoted by

69 “R”) with reduction in SCORAD **(A)** and epidermal thickness **(B)** following  
70 treatment. FDR <0.03 (A) and <0.02 (B).

71

72 **Supplementary Table E5.** Antibodies (with specific vendor, clone, isotype, and  
73 dilution value) used in immunohistochemistry.

74

75 **Supplementary Table E6.** Comparison of mRNA expression differences (FCHs)  
76 in pre (Wk0) and post (Wk12 or D56) LS skin biopsies from psoriasis and atopic  
77 dermatitis patients treated with CsA. Psoriasis data is from (Haider et al., J  
78 Immunol 2008 180(3):1913-20) *AD/atopic dermatitis; PsO/psoriasis; LS/lesional;*  
79 *Wk/week; D/day; FCH/fold change; ND/not done.*

80

Table E1: Characteristics of study patients

| Patient # | Gender | Age | Race <sup>a</sup> | SCORAD <sup>b</sup> Baseline | IgE <sup>c</sup> Base line | Eos % <sup>d</sup> Base line | SCORAD Week 2 | IgE Week 2 | Eos % Week 2 | SCORAD Week 12 | IgE Week 12 | Eos % Week 12 | FLG*     |
|-----------|--------|-----|-------------------|------------------------------|----------------------------|------------------------------|---------------|------------|--------------|----------------|-------------|---------------|----------|
| 1         | M      | 32  | A                 | 84.5                         | 70530                      | 17.3                         | 64.5          | 54729      | 6.7          | 27             | 69068       | 10            |          |
| 2         | M      | 18  | A                 | 73.5                         | 2615                       | 12.1                         | 44.5          | 1825       | 9.6          | 37             | 2500        | 17            |          |
| 3         | M      | 32  | C                 | 74.5                         | 3812                       | 8.9                          | 20            | 4129       | 5.3          | 16             | 3560        | 12.5          |          |
| 4         | M      | 59  | C                 | 97                           | 5376                       | 16.6                         | 46.5          | 3985       | 8.2          | 39.5           | 3443        | 7.5           |          |
| 5         | M      | 32  | A                 | 54                           | 745                        | 12.3                         | 43.5          | 583        | 8            | 25.5           | 562         | 6.1           |          |
| 6         | M      | 63  | C                 | 98                           | 6033                       | 11.6                         | 58            | 5538       | 17.2         | 16.1           | 8397        | 5.7           | Negative |
| 7         | M      | 34  | C                 | 76                           | 100                        | 4.2                          | 76            | 100        | 4.2          | 59             | 151         | 3.7           | Negative |
| 8         | M      | 33  | C                 | 66                           | 1281                       | 9.6                          | 5.9           | 1427       | 5.25         | 0              | 948         | 4.1           | Negative |
| 9         | M      | 45  | C                 | 56                           | 1281.5                     | 2.6                          | 15            | 360        | 1.2          | 8              | 1600.9      | 2.5           |          |
| 10        | F      | 49  | C                 | 56                           | 1304                       | 8                            | 24            | 1605       | 5.7          | 8              | 763         | 5.9           |          |
| 11        | M      | 48  | C                 | 51                           | 41                         | 3.6                          | 18            | 28         | 2.6          | 7              | 20          | 3.1           | Negative |
| 12        | F      | 59  | C                 | 45                           | 14.1                       | 1.4                          | NA            | NA         | NA           | 15             | 11.7        | 1.6           | Negative |
| 13        | F      | 50  | C                 | 44                           | 1269                       | 6.3                          | 21            | 820        | 6            | 7              | 1100        | 5.2           | Negative |
| 14        | F      | 67  | C                 | 53                           | 6                          | 0.6                          | 14            | 5          | 1.1          | 6              | 5           | 2.2           |          |
| 15        | F      | 40  | C                 | 72                           | 92.2                       | 2.9                          | 40            | 57.5       | 1.3          | 15             | 43          | 1.6           |          |
| 16        | F      | 59  | C                 | 56                           | 3.6                        | 3.5                          | 16            | 4.2        | 1.7          | 6              | 4           | 1.9           |          |
| 17        | M      | 69  | C                 | 61                           | 72.9                       | 2.36                         | NA            | NA         | NA           | 20             | 65          | 2.7           |          |
| 18        | F      | 36  | C                 | 65                           | 492                        | 11.8                         | 26            | 365        | 7.6          | 18             | 258         | 6.4           |          |
| 19        | M      | 42  | C                 | 53                           | 1821                       | 9.2                          | 34            | 1230       | 7.1          | 10             | 211         | 4.3           |          |

\* If not indicated, Filaggrin genotyping was not performed (see supplementary methods)

a: A = African American C = Caucasian

b: SCORing of Atopic Dermatitis (see Methods)

- c: Reference range, 0-114kU/L
- d: Reference range, 0-7% serum eosinophil count

ACCEPTED MANUSCRIPT

| Probe       | Symbol  | Description                                                             |
|-------------|---------|-------------------------------------------------------------------------|
| 229476_s_at | THRSP   | thyroid hormone responsive                                              |
| 229477_at   | THRSP   | thyroid hormone responsive                                              |
| 205030_at   | FABP7   | fatty acid binding protein 7, brain                                     |
| 239929_at   | PM20D1  | peptidase M20 domain containing 1                                       |
| 214240_at   | GAL     | galanin/GMAP prepropeptide                                              |
| 205029_s_at | FABP7   | fatty acid binding protein 7, brain                                     |
| 234980_at   | TMEM56  | transmembrane protein 56                                                |
| 1569909_at  | KRT79   | keratin 79                                                              |
| 229151_at   | SLC14A1 | olute carrier family 14 (urea transporter), member 1 (Kidd blood group) |
| 220801_s_at | HAO2    | hydroxyacid oxidase 2 (long chain)                                      |
| 234513_at   | ELOVL3  | ELOVL fatty acid elongase 3                                             |
| 202218_s_at | FADS2   | fatty acid desaturase 2                                                 |
| 204607_at   | HMGCS2  | 3-hydroxy-3-methylglutaryl-CoA synthase 2 (mitochondrial)               |
| 239108_at   | FAR2    | fatty acyl CoA reductase 2                                              |
| 203400_s_at | TF      | transferrin                                                             |
| 227762_at   |         |                                                                         |
| 207670_at   | KRT85   | keratin 85                                                              |
| 206243_at   | TIMP4   | TIMP metalloproteinase inhibitor 4                                      |
| 243168_at   |         |                                                                         |
| 231262_at   |         |                                                                         |
| 205883_at   | ZBTB16  | zinc finger and BTB domain containing 16                                |
| 230964_at   | FREM2   | FRAS1 related extracellular matrix protein 2                            |
| 1555318_at  | HIF3A   | hypoxia inducible factor 3, alpha subunit                               |
| 233932_at   |         |                                                                         |
| 222124_at   | HIF3A   | hypoxia inducible factor 3, alpha subunit                               |
| 208962_s_at |         |                                                                         |
| 204416_x_at | APOC1   | apolipoprotein C-I                                                      |
| 228409_at   | PLIN4   | perilipin 4                                                             |

| <b>Table E3 RT-PCR average expression values and confidence intervals</b> |                 |            |            |                 |            |            |                 |            |            |                 |            |            |
|---------------------------------------------------------------------------|-----------------|------------|------------|-----------------|------------|------------|-----------------|------------|------------|-----------------|------------|------------|
| <b>Gene</b>                                                               | <b>Wk2 vs</b>   | <b>LCI</b> | <b>UCI</b> | <b>Wk12 vs</b>  | <b>LCI</b> | <b>UCI</b> | <b>Wk2 vs</b>   | <b>LCI</b> | <b>UCI</b> | <b>Wk12 vs</b>  | <b>LCI</b> | <b>UCI</b> |
|                                                                           | <b>Wk0 (LS)</b> |            |            | <b>Wk0 (LS)</b> |            |            | <b>Wk0 (NL)</b> |            |            | <b>Wk0 (NL)</b> |            |            |
| MMP12                                                                     | -2.27           | -3.73      | -0.82      | -3.54           | -5         | -2.09      | -0.47           | -1.97      | 1.03       | -1.49           | -2.99      | 0.01       |
| S100A12                                                                   | -2.75           | -4.28      | -1.22      | -4.47           | -6         | -2.94      | -0.73           | -2.3       | 0.84       | -1.63           | -3.2       | -0.05      |
| IL-13                                                                     | -2.72           | -4.47      | -0.97      | -4.21           | -5.97      | -2.47      | -3.18           | -4.98      | -1.4       | -3.47           | -5.27      | -1.67      |
| IL-19                                                                     | -2.87           | -4.24      | -1.5       | -3.73           | -5.1       | -2.36      | -0.44           | -1.85      | 0.96       | -1.9            | -3.3       | -0.49      |
| CCL13                                                                     | -1.33           | -2.31      | -0.36      | -0.98           | -1.96      | -0.01      | -1.63           | -2.63      | -0.6       | -1.76           | -2.76      | -0.76      |
| CCL17                                                                     | -2.36           | -3.28      | -1.43      | -2.12           | -3.06      | -1.2       | -0.62           | -1.58      | 0.33       | -0.66           | -1.61      | 0.29       |
| CCL18                                                                     | -1.71           | -2.61      | -0.81      | -2.6            | -3.5       | -1.71      | -1.41           | -2.33      | -0.5       | -2.16           | -3.09      | -1.24      |
| IL-9                                                                      | -3.21           | -4.4       | -2.03      | -3.17           | -4.36      | -1.98      | -0.99           | -2.22      | 0.22       | -1.07           | -2.3       | 0.14       |
| IL-22                                                                     | -2.23           | -3.48      | -0.98      | -3.42           | -4.67      | -2.17      | -1.18           | -2.47      | 0.1        | -1.68           | -2.96      | -0.4       |
| S100A7                                                                    | -1.94           | -2.81      | -1.07      | -2.97           | -3.84      | -2.1       | -0.89           | -1.79      | -0         | -1.19           | -2.08      | -0.3       |
| S100A8                                                                    | -1.86           | -3         | -0.72      | -2.76           | -3.9       | -1.62      | -0.45           | -1.62      | 0.72       | -1.13           | -2.31      | 0.04       |
| S100A9                                                                    | -2.44           | -3.32      | -1.55      | -3.25           | -4.14      | -2.36      | -0.5            | -1.42      | 0.41       | -0.91           | -1.83      | -0         |
| IFN $\gamma$                                                              | -2.09           | -7.14      | 2.95       | -0.5            | -5.55      | 4.539      | -0.51           | -4.54      | 5.55       | -1.02           | -6.07      | 4.02       |
| CXCL9                                                                     | -2.33           | -3.19      | -1.48      | -2.52           | -3.37      | -1.67      | -1.21           | -2.08      | -0.3       | -1.53           | -2.4       | -0.65      |
| CXCL10                                                                    | -2.15           | -3.29      | -1.01      | -2.32           | -3.46      | -1.18      | -0.81           | -1.98      | 0.36       | -1.53           | -2.69      | -0.36      |
| MX1                                                                       | -0.93           | -1.38      | -0.49      | -1.11           | -1.56      | -0.67      | -0.16           | -0.61      | 0.3        | -0.06           | -0.52      | 0.4        |
| STAT1                                                                     | -0.64           | -0.99      | -0.3       | -0.94           | -1.28      | -0.59      | -0.4            | -0.75      | -0         | -0.29           | -0.64      | 0.07       |
| IL-1B                                                                     | -1.16           | -1.91      | -0.41      | -0.62           | -1.37      | 0.132      | 0.26            | -0.51      | 1.03       | -0.11           | -0.88      | 0.67       |
| IL-8                                                                      | -2.58           | -3.93      | -1.22      | -3.08           | -4.43      | -1.73      | -1.14           | -2.53      | 0.25       | -1.44           | -2.83      | -0.05      |
| IL-17A                                                                    | -0.61           | -1.4       | 0.182      | -0.95           | -1.74      | -0.16      | -0.54           | -1.35      | 0.28       | -0.18           | -1         | 0.63       |
| IL-12B                                                                    | -1.22           | -2.63      | 0.186      | -2.1            | -3.51      | -0.7       | -0.29           | -1.74      | 1.16       | -0.42           | -1.87      | 1.02       |
| CXCL1                                                                     | 1.57            | -2.19      | -0.95      | -2.16           | -2.78      | -1.53      | -0.22           | -0.86      | 0.42       | -0.18           | -0.82      | 0.46       |
| CCL20                                                                     | -1.47           | -2.44      | -0.51      | -1.94           | -2.9       | -0.97      | -0.36           | -1.35      | 0.63       | -0.87           | -1.86      | 0.12       |
| PI3                                                                       | -2.41           | -3.83      | -1         | -3.08           | -4.49      | -1.66      | -1.18           | -2.63      | 0.28       | -1.74           | -3.19      | -0.28      |
|                                                                           |                 |            |            |                 |            |            |                 |            |            |                 |            |            |

*LCI/ lower confidence interval; UCI/upper confidence interval; LS/ lesional; NL/ non-lesional; Wk/week*



**Table E4. Correlation of reduction of inflammatory markers and epidermal biomarkers with disease improvement following CsA**

**A. Lesional skin biomarkers significantly correlated with improvement in the SCORAD index following CsA**

| <b>Disease Biomarkers in LS Skin</b> | <b>Spearman Correlation</b> | <b>P-value</b> |
|--------------------------------------|-----------------------------|----------------|
| S100A7 (R)                           | 0.58                        | <0.001         |
| IL-13 (R)                            | 0.51                        | <0.001         |
| IL-22 (R)                            | 0.51                        | <0.01          |
| MMP12 (R)                            | 0.50                        | <0.01          |
| CCL26 (R)                            | 0.49                        | <0.01          |
| S100A9 (R)                           | 0.48                        | <0.01          |
| CCL18 (R)                            | 0.47                        | <0.01          |
| CCL17 (R)                            | 0.45                        | <0.01          |
| CD206 (I)                            | 0.43                        | <0.01          |
| CD3 (I)                              | 0.42                        | <0.01          |
| Epidermal Thickness (I)              | 0.42                        | <0.01          |
| S100A12 (R)                          | 0.42                        | <0.01          |
| CXCL10 (R)                           | 0.42                        | <0.01          |
| CD83 (I)                             | 0.41                        | <0.05          |
| CCL22 (R)                            | 0.41                        | <0.05          |

**B. Lesional skin biomarkers significantly correlated with reduction of epidermal thickness following CsA**

| <b>Disease Biomarkers in LS Skin</b> | <b>Spearman Correlation</b> | <b>P-value</b> |
|--------------------------------------|-----------------------------|----------------|
| K16 (R)                              | 0.65                        | <0.001         |
| IL-13 (R)                            | 0.57                        | <0.001         |
| S100A7 (R)                           | 0.56                        | <0.001         |
| S100A9 (R)                           | 0.55                        | <0.001         |
| PI3 (R)                              | 0.53                        | <0.001         |
| S100A12 (R)                          | 0.53                        | <0.001         |
| CD83 (I)                             | 0.52                        | <0.001         |
| S100A8 (R)                           | 0.48                        | <0.01          |
| IL-19 (R)                            | 0.47                        | <0.01          |
| MMP12 (R)                            | 0.43                        | <0.01          |
| SCORAD Improvement                   | 0.42                        | <0.01          |
| SCORAD                               | 0.42                        | <0.01          |

**Table E5. Antibodies used for immunohistochemical analysis**

| <b>Antibody</b>  | <b>Vendor</b>  | <b>Clone</b> | <b>Isotype</b> | <b>Dilution</b> |
|------------------|----------------|--------------|----------------|-----------------|
| Keratin 16 (K16) | Serotec        | LL025        | IgG1           | 1:100           |
| Ki67             | Santa Cruz     | MIB-1        | IgG1           | 1:100           |
| CD3              | BD Biosciences | SK7          | IgG1           | 1:100           |
| CD11c            | BD Biosciences | B-ly6        | IgG1           | 1:100           |
| CD206            | Genetex        | 15-2         | IgG1           | 1:100           |
| CD83             | BD Biosciences | HB15e        | IgG2           | 1:20            |
| FLG              | Acris          | FLG01        | IgG1           | 1:500           |
| LOR              | Abcam          | Ab24722      | IgG2           | 1:500           |
| S100A7           | Abcam          | 47C1068      | IgG1           | 1:250           |

Table E6

|                             | AD (LS)             |                      | PsO (LS)            |                     |
|-----------------------------|---------------------|----------------------|---------------------|---------------------|
|                             | Wk2 vs Wk0<br>(FCH) | Wk12 vs Wk0<br>(FCH) | Wk2 vs Wk0<br>(FCH) | D56 vs Wk0<br>(FCH) |
| K16                         | -4                  | -6.1                 | -3.75               | -7.5                |
| <b>General Inflammation</b> |                     |                      |                     |                     |
| S100A12                     | -6.7                | -22.2                | -4                  | -20                 |
| MMP12                       | -4.8                | -11.7                | -5                  | -10                 |
| <b>Innate Immunity</b>      |                     |                      |                     |                     |
| IL-8                        | -6                  | -8.5                 | -15                 | -30                 |
| IL-1 $\beta$                | -2.2                | -1.5                 | -7.5                | -15                 |
| <b>Th2-related</b>          |                     |                      |                     |                     |
| IL-13                       | -6.6                | -18.6                | ND                  | ND                  |
| IL-19                       | -7.3                | -13.3                | -2                  | -6                  |
| CCL18                       | -3.3                | -6.1                 | ND                  | ND                  |
| CCL17                       | -5.1                | -4.4                 | ND                  | ND                  |
| CCL13                       | -2.5                | -2                   | ND                  | ND                  |
| <b>Th9</b>                  |                     |                      |                     |                     |
| IL-9                        | -9.3                | -9                   | ND                  | ND                  |
| <b>Th22</b>                 |                     |                      |                     |                     |
| IL-22                       | -4.7                | -10.7                | -5                  | -5                  |
| <b>Th1/Interferon</b>       |                     |                      |                     |                     |
| MIG/CXCL9                   | -5                  | -5.7                 | -5                  | -6.67               |
| IP10/CXCL10                 | -4.4                | -5                   | -2.53               | -9.6                |
| IFN $\gamma$                | -1.8                | -2.4                 | -1.5                | -2                  |
| MX1                         | -1.9                | -2.2                 | -1.56               | -7                  |
| STAT1                       | -1.6                | -1.9                 | -1.83               | -2                  |
| <b>IL-17</b>                |                     |                      |                     |                     |
| IL-12 $\beta$ /IL-23p40     | -2.3                | -4.3                 | -7.5                | -15                 |
| CCL20                       | -2.8                | -3.8                 | -2                  | -8                  |
| IL-12A/IL-23p19             | 1.1                 | -1.1                 | -6                  | -7.5                |
| IL-17                       | -1.5                | -1.9                 | -2                  | -6                  |

Figure E1

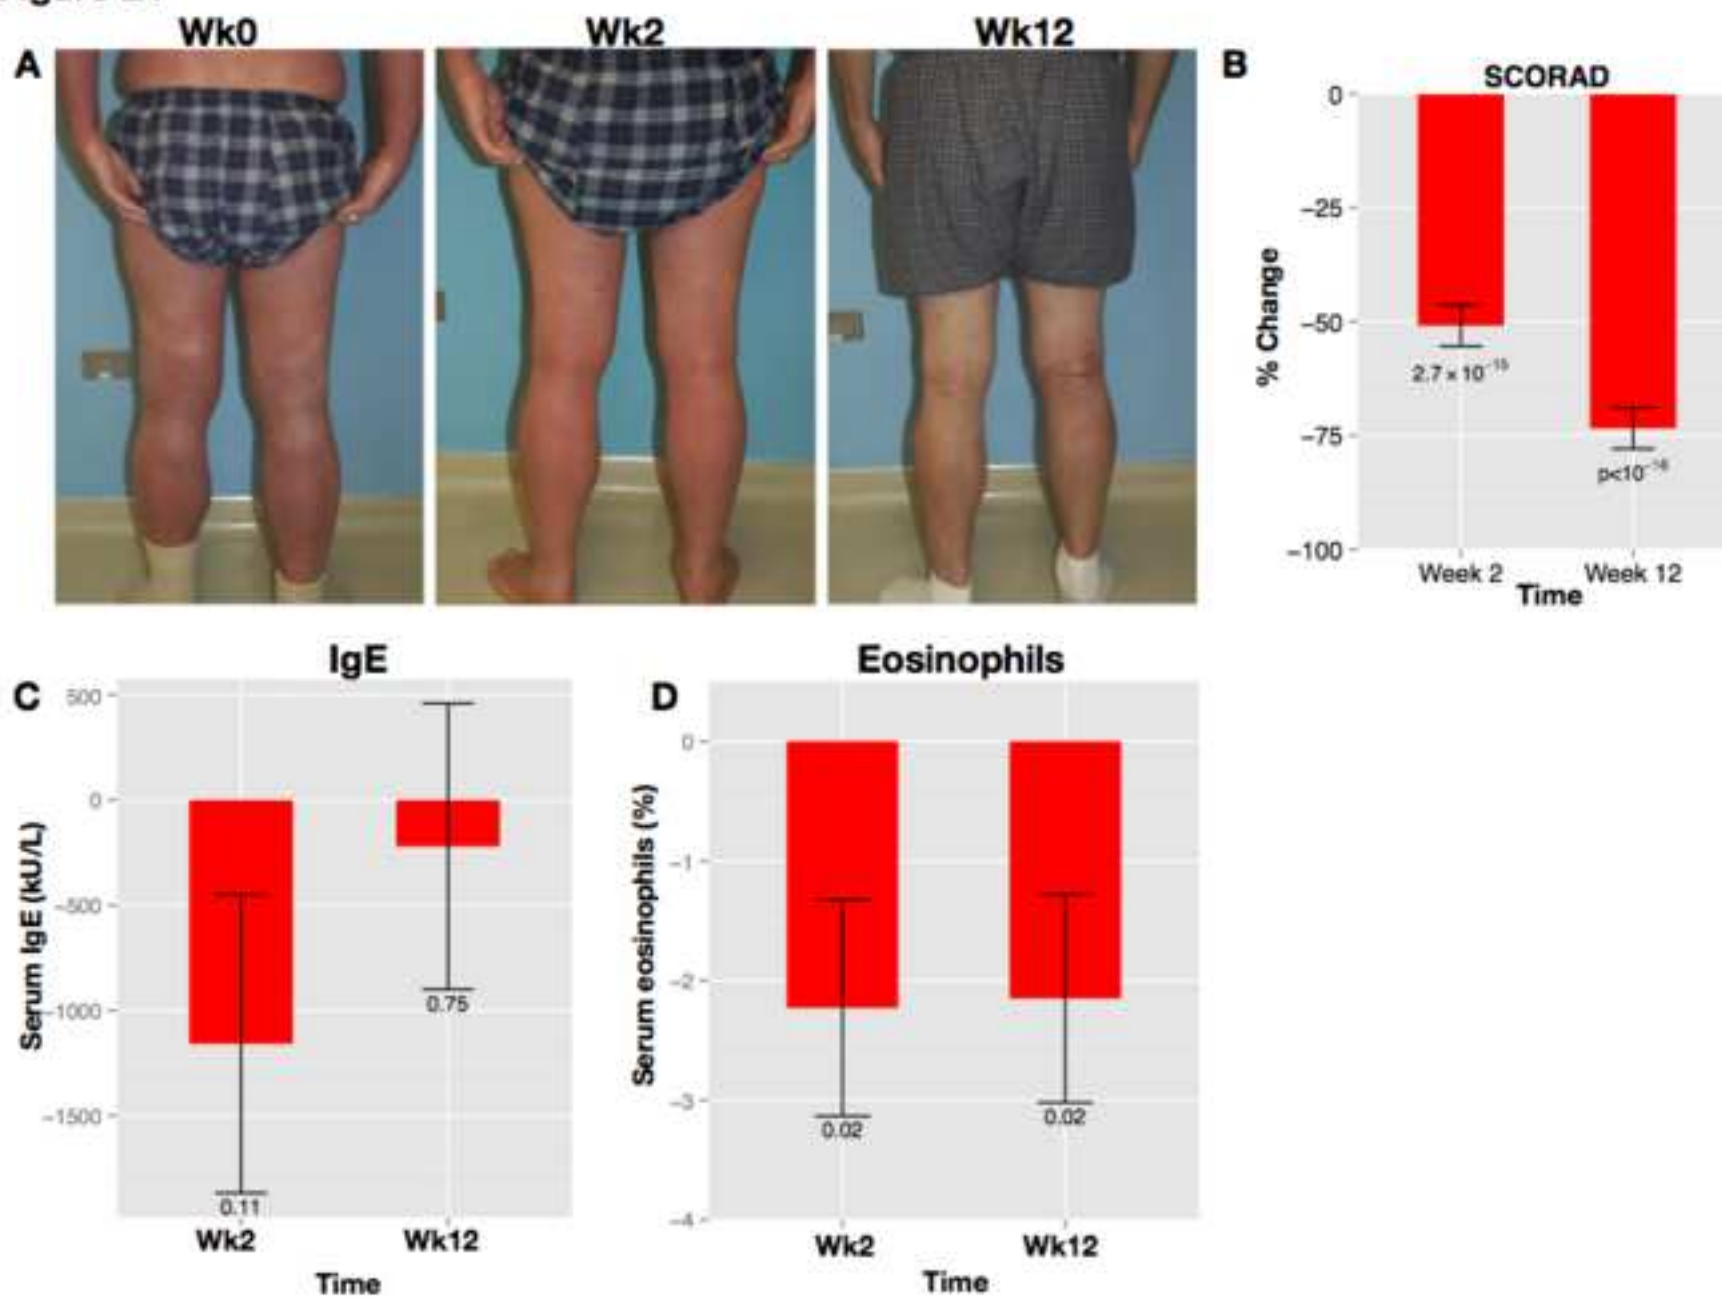

Figure E2

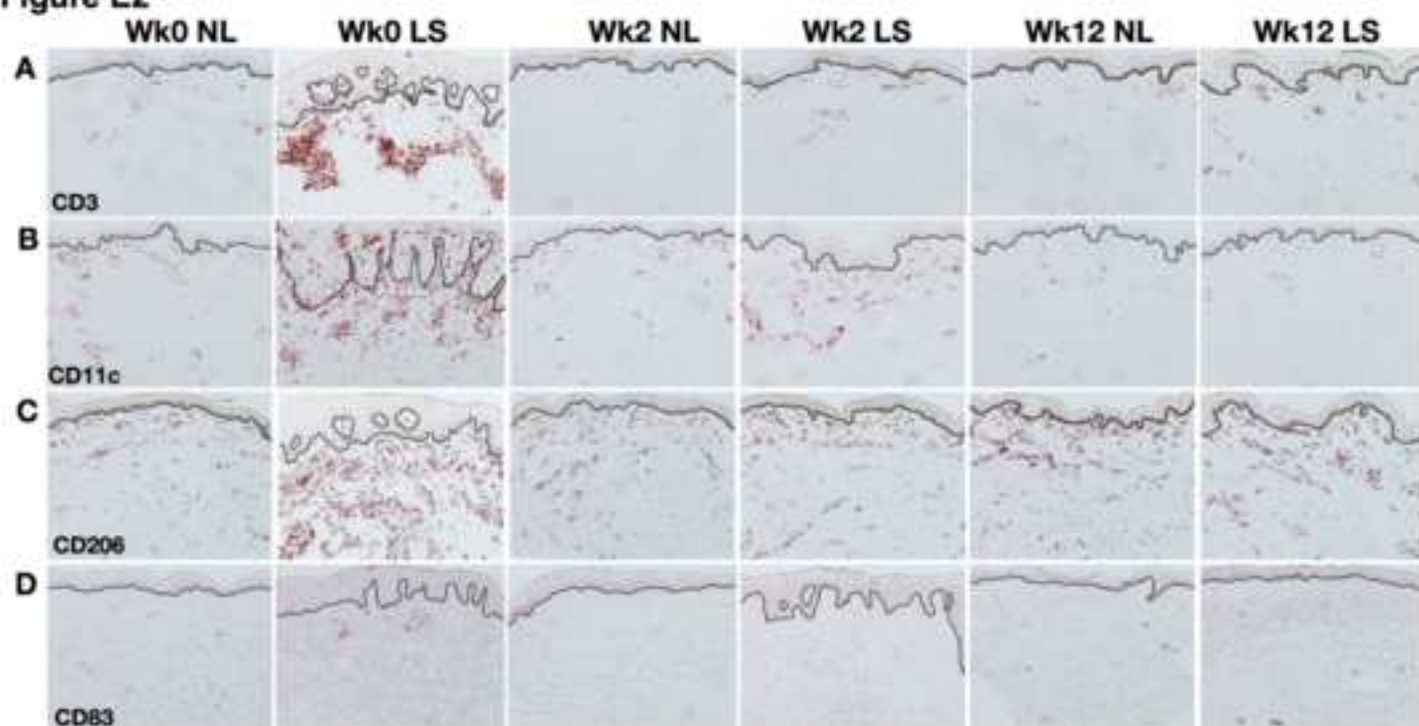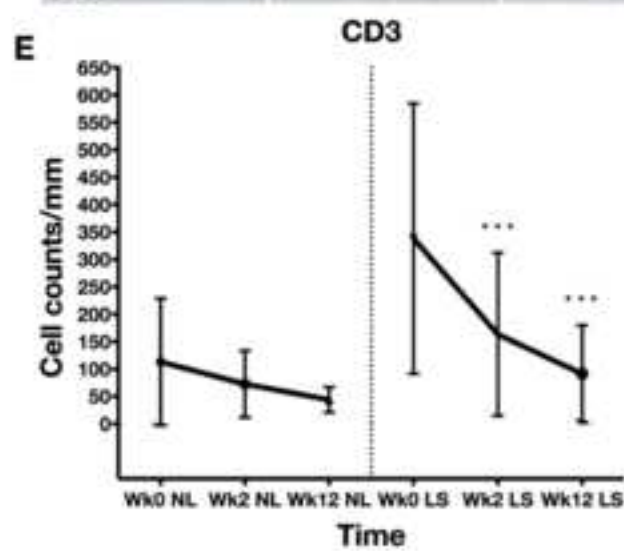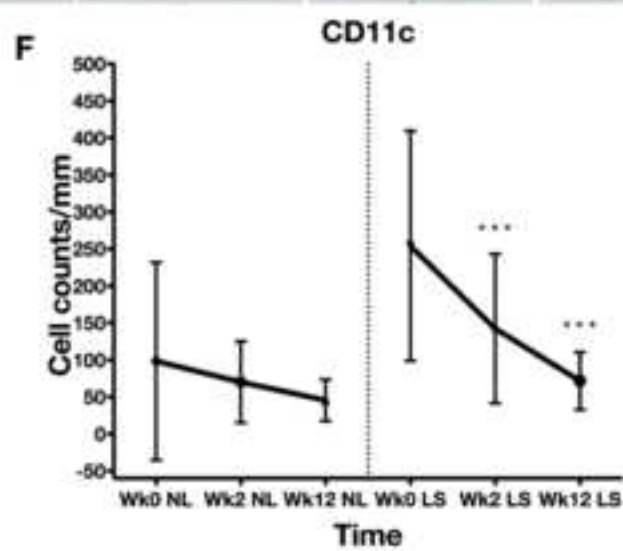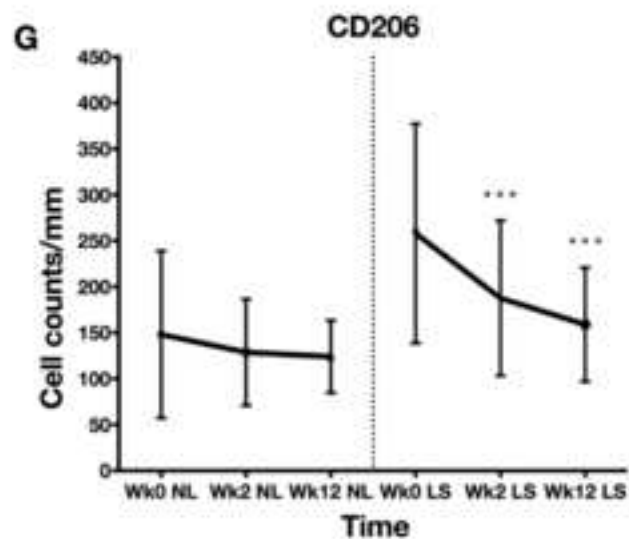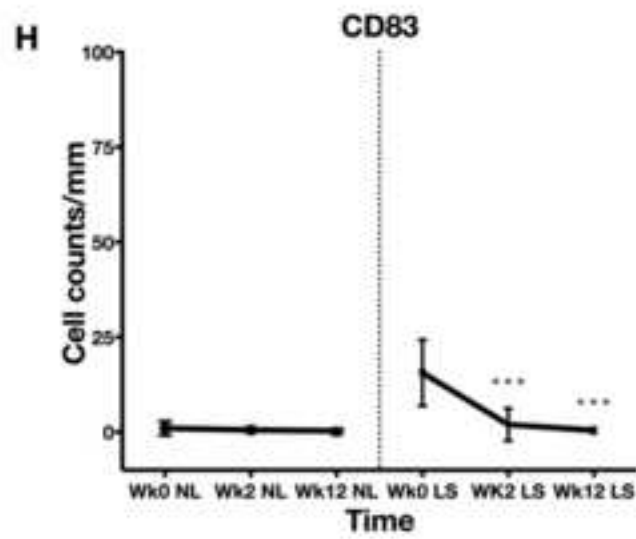

Figure E3

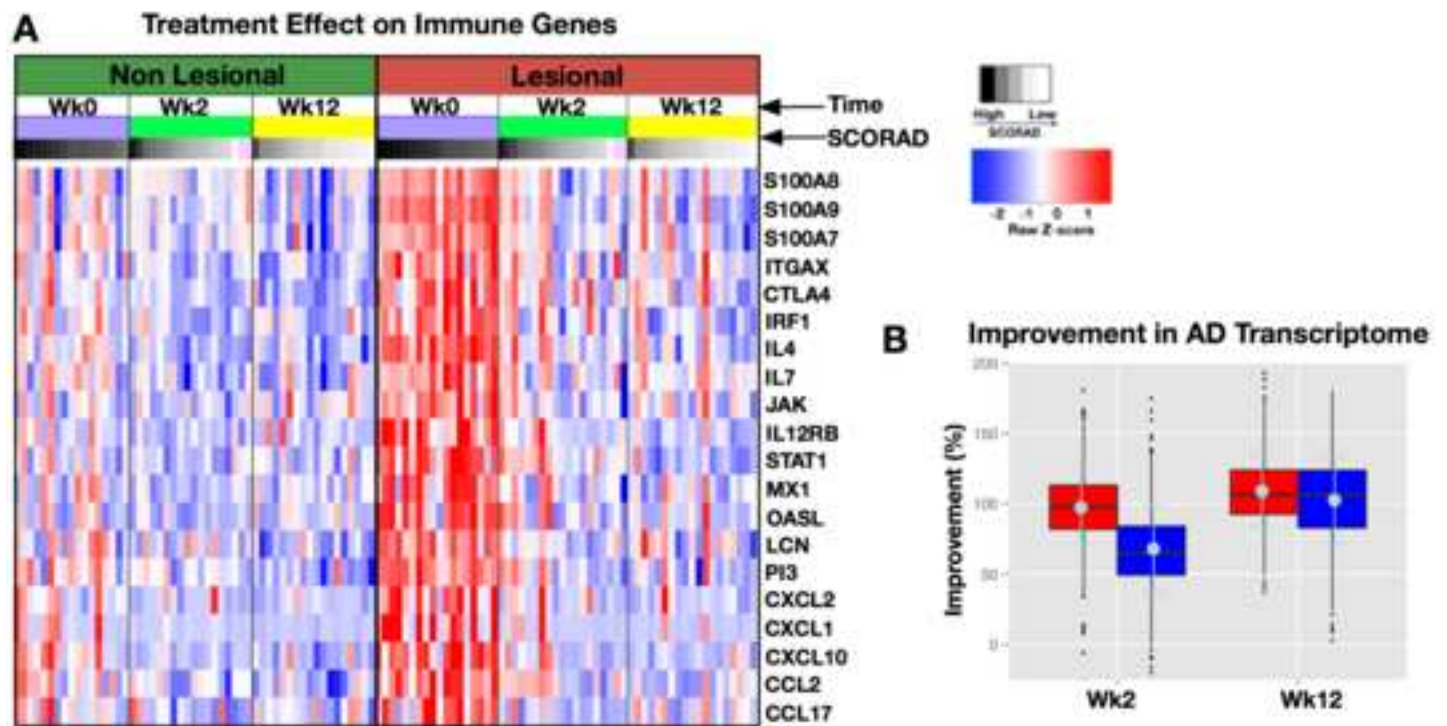

Figure E4

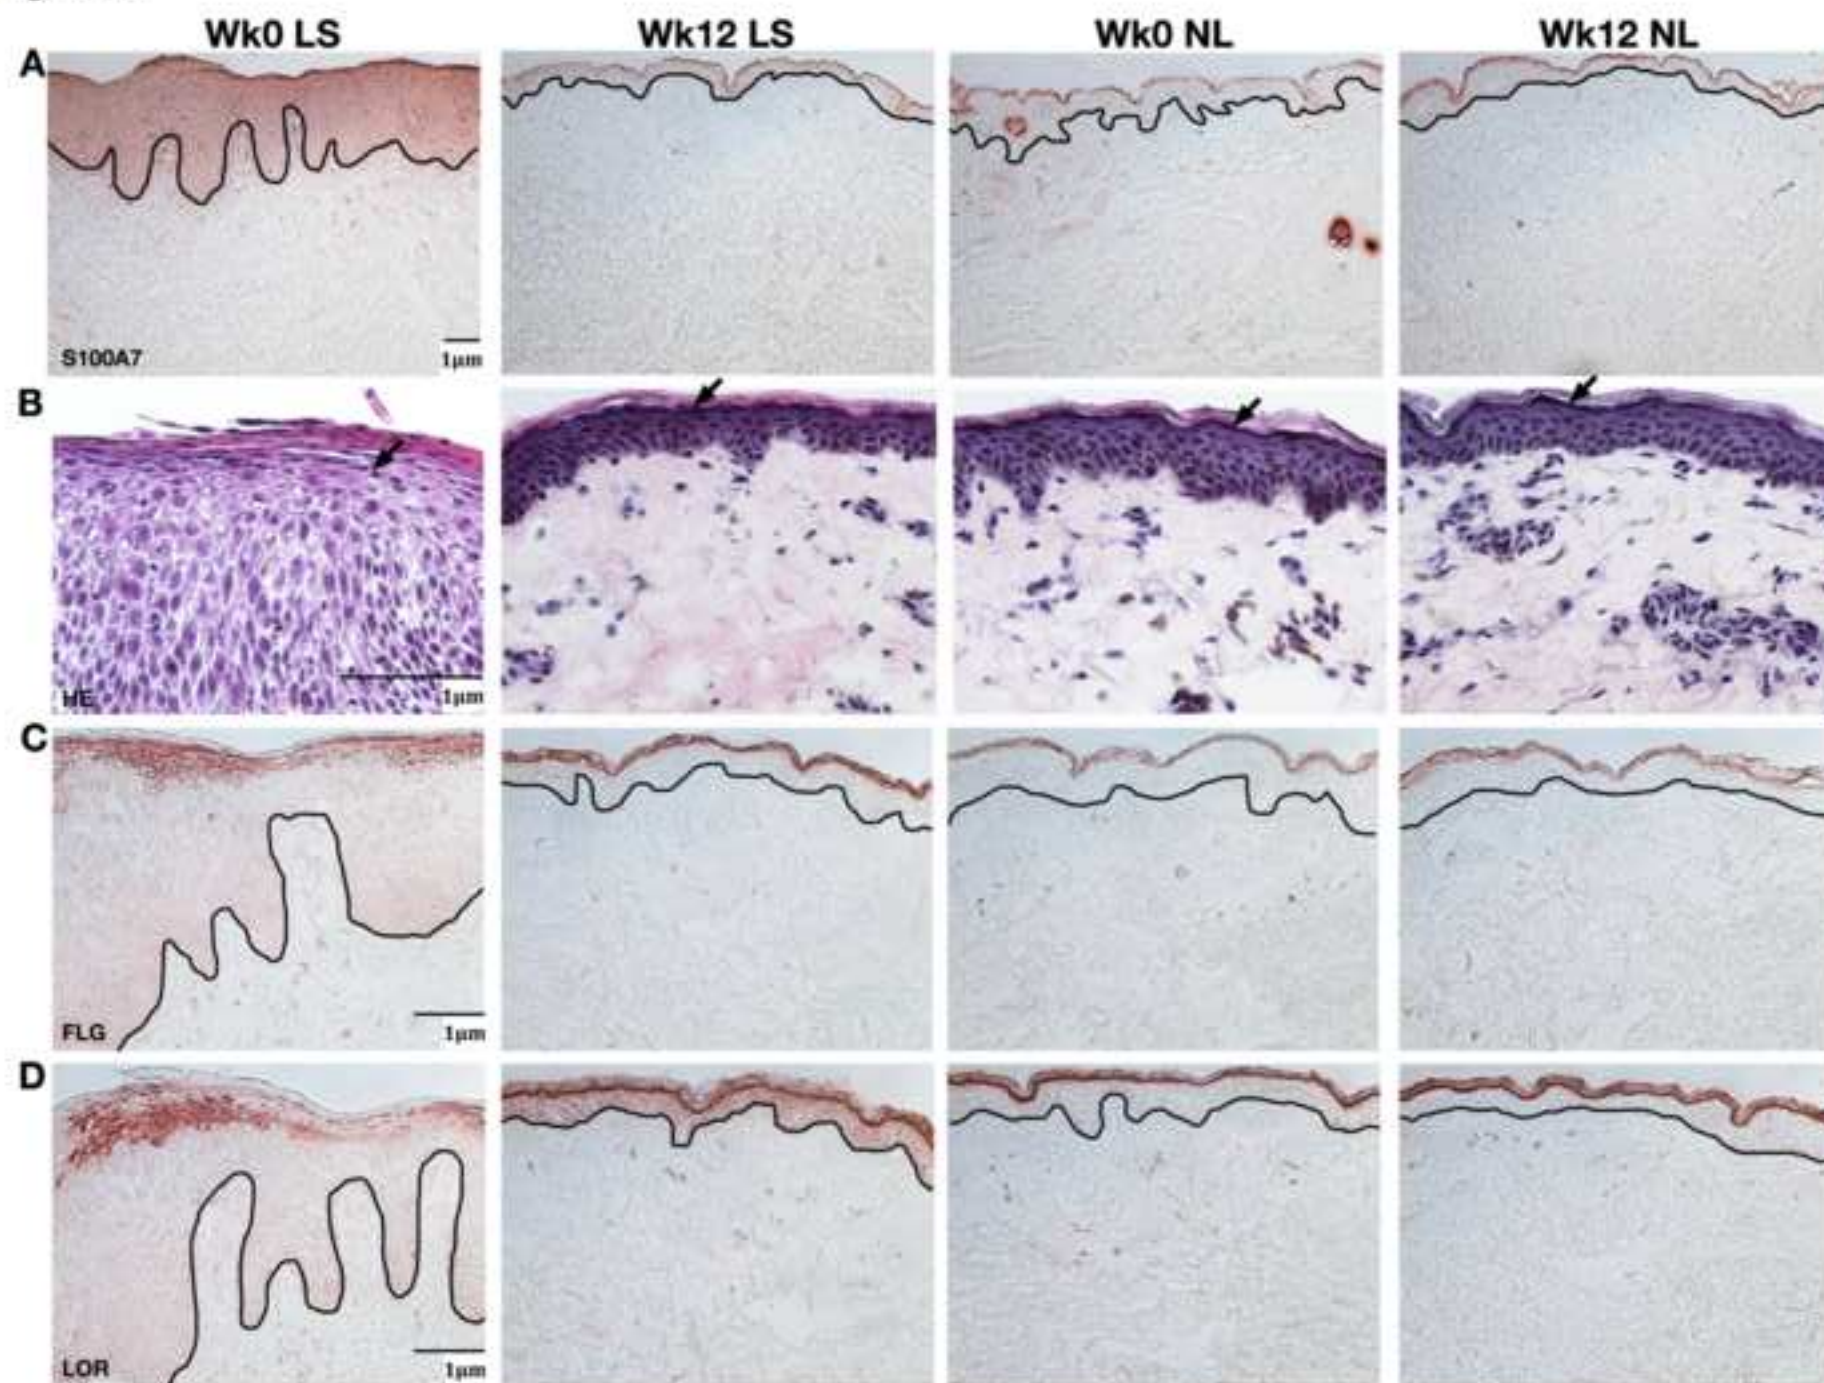



Figure E5

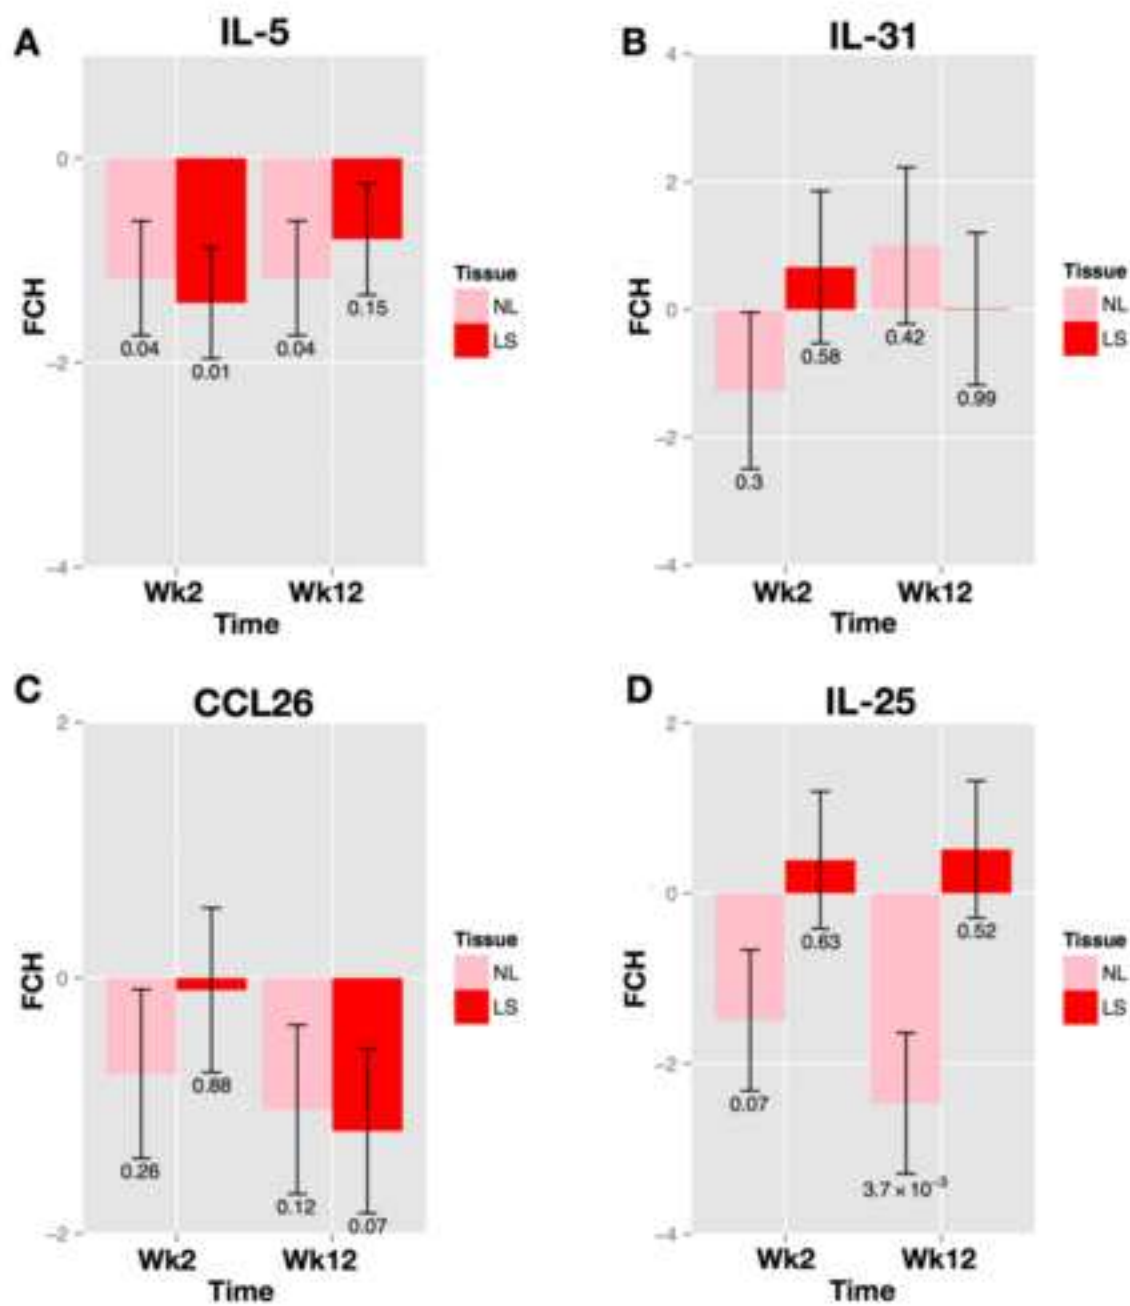

Figure E6

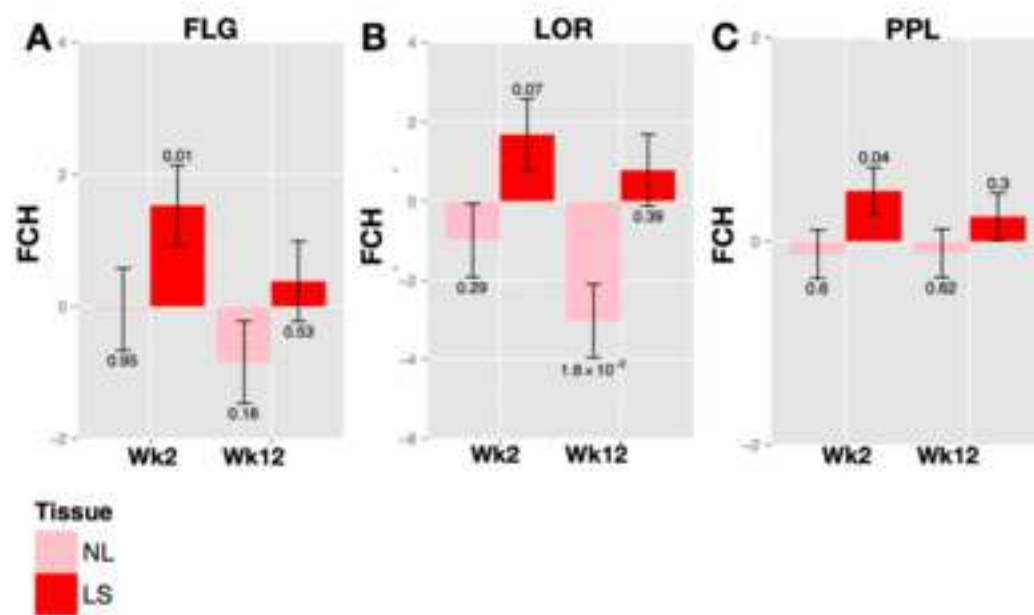

Figure E7

## Responders vs Non Responders

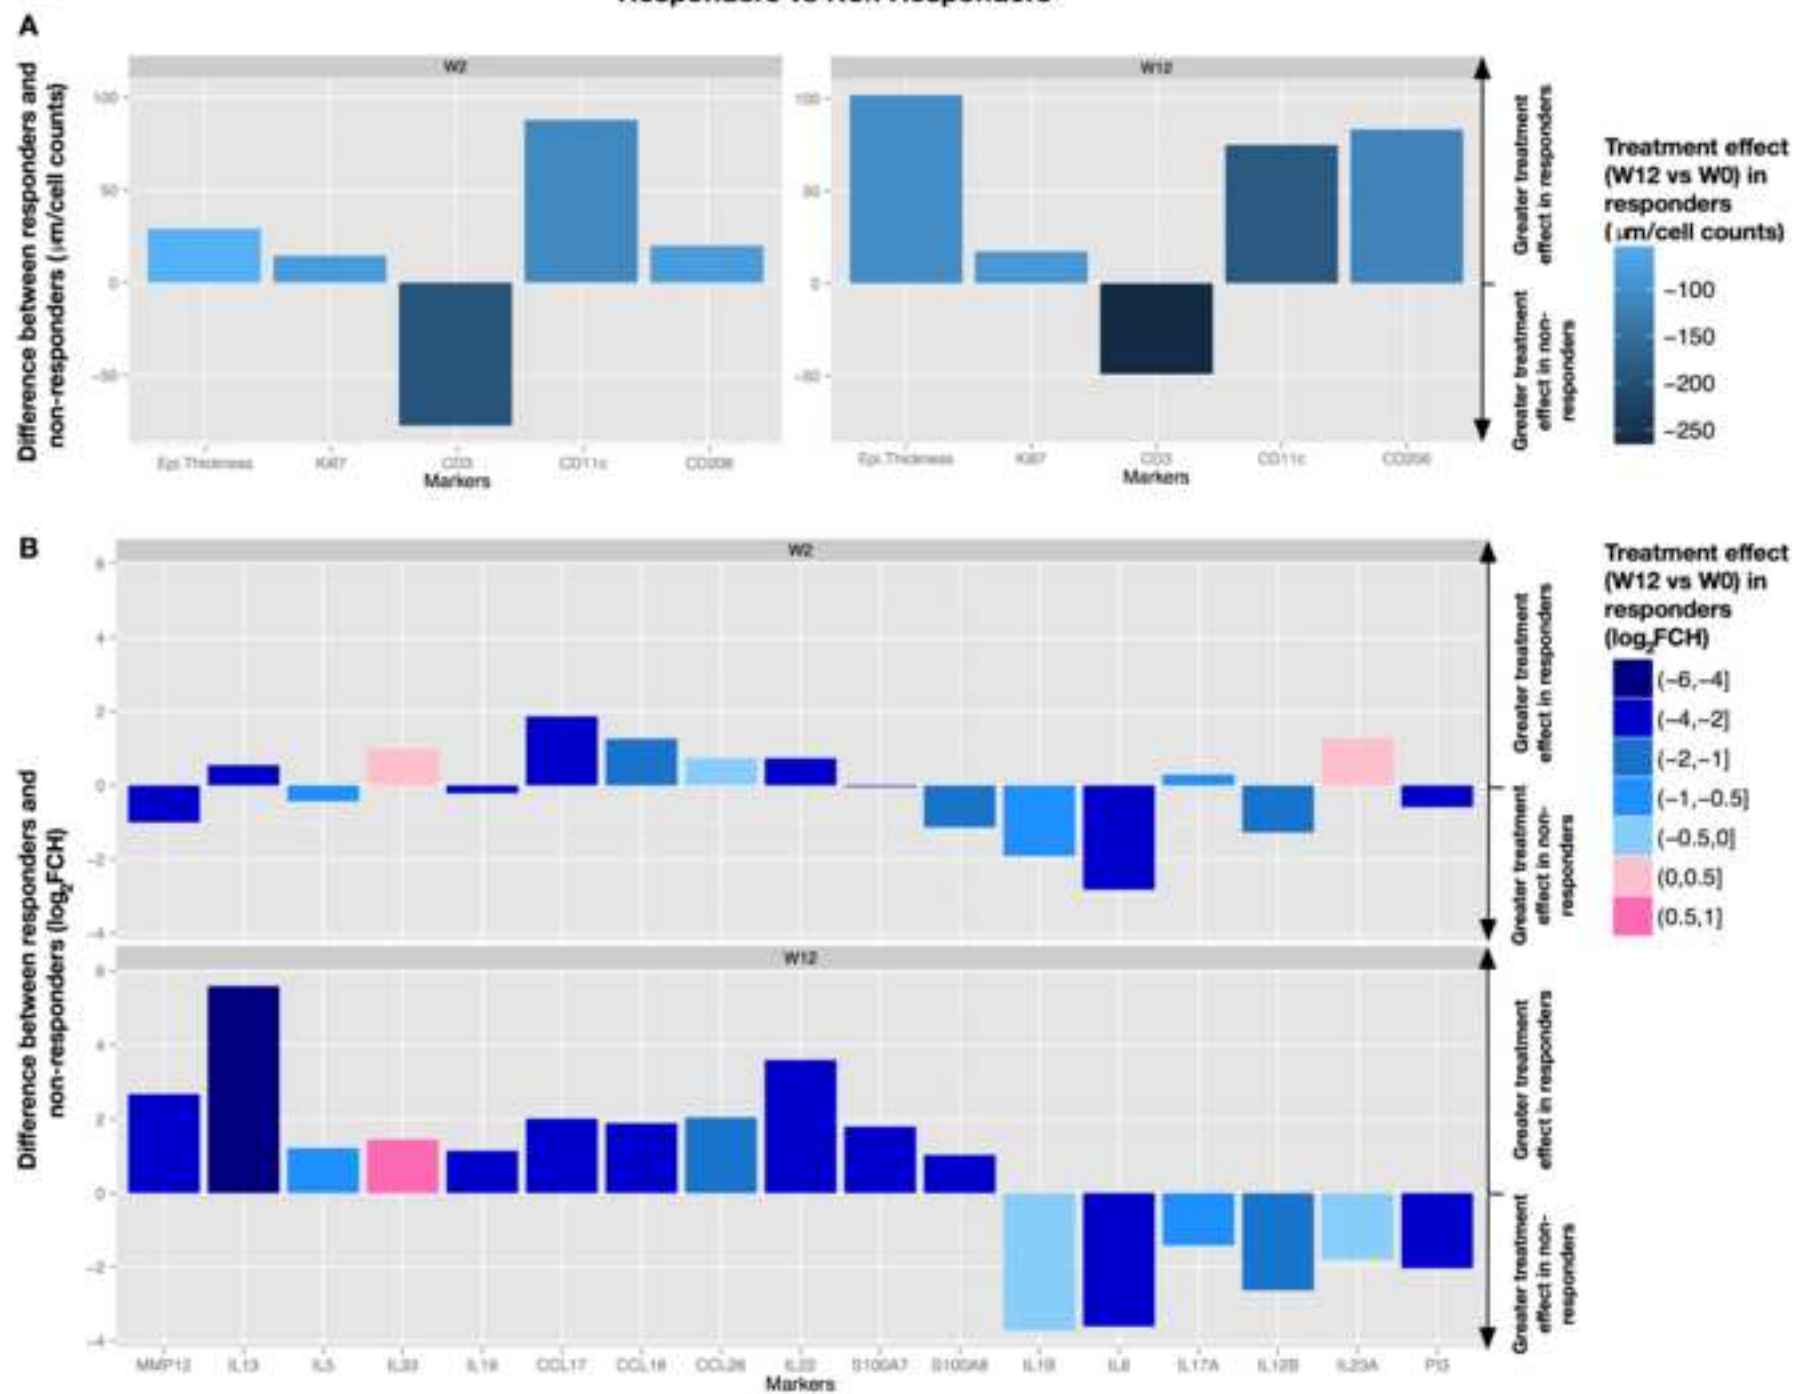

Figure E8

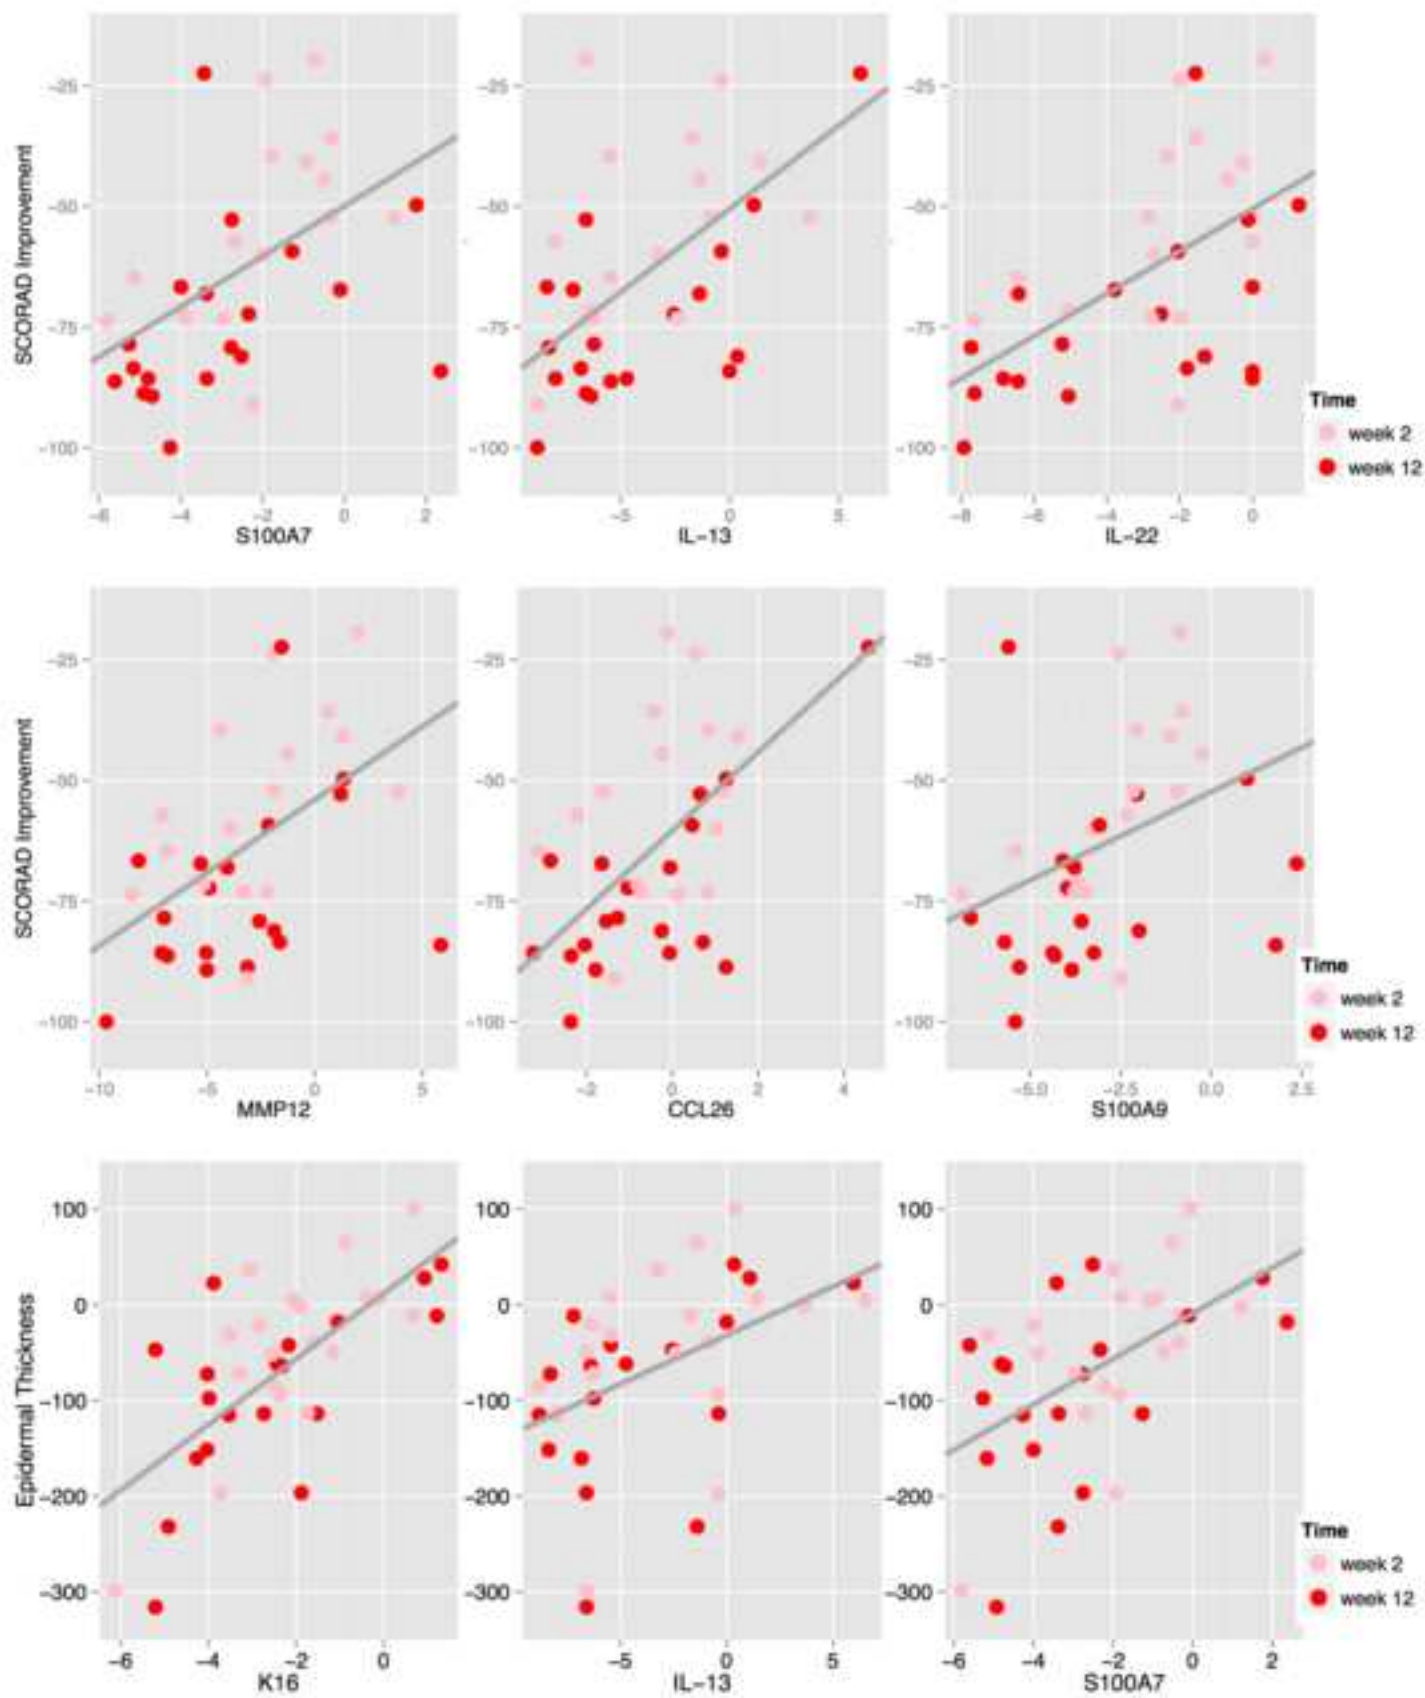

Supplement: NIHMS577312-supplement-supplement_1.pdf [file NIHMS577312-supplement-supplement_1.pdf]
